# Supplementary material
Source: publisher figshare collection journal article supplement (https://frontiersin.figshare.com/ndownloader/files/25608221)
Supplement: Supplementary file 1 [file 25608221]

## Appendices:

### Appendix 1: Sources of supplemental data sets

| Variable                                                            | Temporal availability of data | Data source                       | Data acquisition method or reference for methods details | Location of sampling     |
|---------------------------------------------------------------------|-------------------------------|-----------------------------------|----------------------------------------------------------|--------------------------|
| Total and Organic Particulate Carbon (TPC and POC) concentrations   | 2009-2013                     | WCO time series                   | Thermoquest Flash EA 1112 elemental analyser             | L4                       |
| Total and Organic Particulate Nitrogen (TPN and PON) concentrations | 2009-2013                     | WCO time series                   | Thermoquest Flash EA 1112 elemental analyser             | L4                       |
| CDOM concentration                                                  | 2009-2013                     | WCO time series                   | L4 buoy in-situ sensor                                   | L4                       |
| Suspended particulate matter concentration                          | 2009-2013                     | WCO time series                   | L4 buoy in-situ sensor                                   | L4                       |
| Oxygen concentration                                                | 2009-2017                     | WCO time series                   | L4 buoy in-situ sensor and CTD measurements              | L4                       |
| Phytoplankton abundance                                             | 2009-2014                     | WCO time series                   | (Widdicombe <i>et al.</i> , 2010)                        | L4                       |
| Phytoplankton biomass                                               | 2009-2014                     | WCO time series                   | (Widdicombe <i>et al.</i> , 2010)                        | L4                       |
| Zooplankton abundance                                               | 2009-2016                     | WCO time series                   | (Eloire <i>et al.</i> , 2010)                            | L4                       |
| Benthic macrofauna abundance and biomass                            | 2009-2013                     | WCO time series<br>benthic survey | Box coring Sediment and sieving out                      | L4 benthic station       |
| Benthic fluorescence and chlorophyll                                | 2010-2016                     | WCO time series                   | CTD measurement                                          | L4                       |
| Solar radiation                                                     | 2009-2013                     | PML MET station                   | Weather station stationary sensor                        | PML (see figure 1)       |
| Photosynthetically active radiation                                 | 2009-2013                     | PML MET station                   | Weather station stationary sensor                        | PML (see figure 1)       |
| Air pressure                                                        | 2011-2013                     | Rame Head MET station             | Weather station stationary sensor                        | Rame Head (see figure 1) |
| Rain                                                                | 2011-2013                     | Rame Head MET station             | Weather station stationary sensor                        | Rame Head (see figure 1) |
| Wave height                                                         | 2009-2017                     | Looe buoy                         | In-situ buoy sensor                                      | Looe (see figure 1)      |
| Benthic temperature                                                 | 2010-2016                     | WCO time series                   | CTD measurement                                          | L4                       |

|                                                   |           |                                      |                        |                                        |
|---------------------------------------------------|-----------|--------------------------------------|------------------------|----------------------------------------|
| Benthic photosynthetically active radiation (PAR) | 2010-2016 | WCO time series                      | CTD measurement        | L4                                     |
| Sediment grain size                               | 2009-2012 | WCO time series benthic survey       | Particle Size Analysis | L4 benthic station                     |
| River flow                                        | 2009-2016 | National River Flow Archive          | Flow check gauge       | Gunnislake, Tamar (see figure 1)       |
| Tidal state                                       | 2009-2017 | Permanent Service for Mean Sea Level | Tidal gauge            | Devonport Tidal station (see figure 1) |

## Appendix 2: Sampling campaign of data collection throughout 2017 and 2018

| Variable                          | Field sampling method | 08 / 2017 | 11 / 2017 | 12 / 2017 | 01 / 2018 | 02 / 2018 | 03 / 2018 | 04 / 2018 | 05-06 / 2018 |
|-----------------------------------|-----------------------|-----------|-----------|-----------|-----------|-----------|-----------|-----------|--------------|
| Resuspension / erosion thresholds | Box corer             | ✓         | ✓         |           |           |           |           | ✓         | ✓            |
| Bioturbation                      | Box corer             | ✓         | ✓         | ✓         | ✓         | ✓         | ✓         | ✓         | ✓            |
| Water column SPM and POC          | Rosette sampler       | ✓         | ✓         | ✓         | ✓         | ✓         | ✓         | ✓         | ✓            |
| Nepheloid SPM and POC             | Multi-corer           | ✓         | ✓         | ✓         | ✓         | ✓         | ✓         | ✓         | ✓            |
| Sediment grain size               | Box corer             | ✓         | ✓         | ✓         | ✓         | ✓         | ✓         | ✓         | ✓            |
| Sediment density                  | Box corer             | ✓         | ✓         | ✓         | ✓         | ✓         | ✓         | ✓         | ✓            |
| Sediment OC content               | Box corer             | ✓         | ✓         | ✓         | ✓         | ✓         | ✓         | ✓         | ✓            |
| Water column temperature          | CTD                   | ✓         | ✓         | ✓         | ✓         | ✓         | ✓         | ✓         | ✓            |
| Water column fluorescence         | CTD                   | ✓         | ✓         | ✓         | ✓         | ✓         | ✓         | ✓         | ✓            |
| Water column density              | CTD                   | ✓         | ✓         | ✓         | ✓         | ✓         | ✓         | ✓         | ✓            |

|                       |     |   |   |   |   |   |   |   |   |
|-----------------------|-----|---|---|---|---|---|---|---|---|
| Water column salinity | CTD | ✓ | ✓ | ✓ | ✓ | ✓ | ✓ | ✓ | ✓ |
|-----------------------|-----|---|---|---|---|---|---|---|---|

### Appendix 3: Flume programmes

| K-index | Dwell time in minutes | Velocity in m/s | Shear stress in Pa |
|---------|-----------------------|-----------------|--------------------|
| 0       | 10                    | 0.000128103     | 0.017409884        |
| 1       | 10                    | 0.001195501     | 1.516262444        |
| 2       | 10                    | 0.002013365     | 4.300506215        |
| 3       | 10                    | 0.002856191     | 8.654637122        |
| 4       | 10                    | 0.003718308     | 14.66780767        |
| 5       | 10                    | 0.00470084      | 23.44365984        |
| 6       | 10                    | 0.005713836     | 34.63618521        |
| 7       | 10                    | 0.006607689     | 46.32054397        |
| 8       | 10                    | 0.007540815     | 60.32690907        |
| 9       | 10                    | 0.008451207     | 75.77255817        |
| 10      | 10                    | 0.009468514     | 95.11260725        |
| 11      | 10                    | 0.010376729     | 114.2339979        |

### Appendix 4: Details on Predictors and Responses of ANOSIM tests carried out throughout this study

| Test number | Predictors                                                      | Response                                                                                                             |
|-------------|-----------------------------------------------------------------|----------------------------------------------------------------------------------------------------------------------|
| 1           | 5 periods (for inclusion of months in each period, see Table I) | Full data set, including all variables                                                                               |
| 2           | 5 periods (for inclusion of months in each period, see Table I) | DIN concentration throughout the water column (0-50 m)                                                               |
| 3           | 5 periods (for inclusion of months in each period, see Table I) | Shear-stress driven DIN flux and DIN concentration at 50 m depth                                                     |
| 4           | 5 periods (for inclusion of months in each period, see Table I) | POC concentration throughout the water column (0-50 m)                                                               |
| 5           | 5 periods (for inclusion of months in each period, see Table I) | POC concentration throughout the sediment (0-5 cm)                                                                   |
| 6           | 5 periods (for inclusion of months in each period, see Table I) | Shear-stress driven POC flux, POC concentration at the sediment surface (0-1 cm) and POC concentration at 50 m depth |
| 7           | 5 periods (for inclusion of months in each period, see Table I) | Variables of influence for DM flux driven by biological particle mixing (see Table II)                               |

|    |                                                                 |                                                                                                                                                                  |
|----|-----------------------------------------------------------------|------------------------------------------------------------------------------------------------------------------------------------------------------------------|
| 8  | 5 periods (for inclusion of months in each period, see Table I) | Variables of influence for DM flux driven by advective flushing (see Table II)                                                                                   |
| 9  | 5 periods (for inclusion of months in each period, see Table I) | Variables of influence for DM flux driven by bioirrigation (see Table II)                                                                                        |
| 10 | 5 periods (for inclusion of months in each period, see Table I) | Variables of influence for DM flux driven by diffusion (see Table II)                                                                                            |
| 11 | 5 periods (for inclusion of months in each period, see Table I) | Variables of influence for DM flux driven by physical resuspension (see Table II)                                                                                |
| 12 | 5 periods (for inclusion of months in each period, see Table I) | Variables driving upward-transport and resuspension of PM (see Table II)                                                                                         |
| 13 | 5 periods (for inclusion of months in each period, see Table I) | Variables driving downward-transport and deposition of PM (see Table II)                                                                                         |
| 14 | 5 periods (for inclusion of months in each period, see Table I) | Variables of influence for DM flux driven by biological particle mixing (see Table II), excluding those variables that are not affected by PM exchange processes |
| 15 | 5 periods (for inclusion of months in each period, see Table I) | Variables of influence for DM flux driven by physical resuspension (see Table II), excluding those variables that are not affected by PM exchange processes      |
| 16 | 5 periods (for inclusion of months in each period, see Table I) | Variables of influence for DM flux driven by bioirrigation (see Table II), excluding those variables that are not affected by PM exchange processes              |
| 17 | 5 periods (for inclusion of months in each period, see Table I) | Variables of influence for DM flux driven by diffusion (see Table II), excluding those variables that are not affected by PM exchange processes                  |
| 18 | 5 periods (for inclusion of months in each period, see Table I) | Variables of influence for DM flux driven by advection (see Table II), excluding those variables that are not affected by PM exchange processes                  |
| 19 | 5 periods (for inclusion of months in each period, see Table I) | Variables driving upward-transport and resuspension of PM (see Table II), excluding those variables that are not affected by DM exchange processes               |
| 20 | 5 periods (for inclusion of months in each period, see Table I) | Variables driving downward-transport and deposition of PM (see Table II), excluding those variables that are not affected by DM exchange processes               |

## Appendix 5: VIP scores of the OPLS models

| OPLS model | Driver | VIP score |
|------------|--------|-----------|
|------------|--------|-----------|

|                                                                                                                                                 |                               |        |
|-------------------------------------------------------------------------------------------------------------------------------------------------|-------------------------------|--------|
| Model 1; Responses: Full data set with all variables; Predictors: Five time periods as specified in Table I                                     | PAR at 50 m                   | 1.0065 |
|                                                                                                                                                 | Salinity at 50 m              | 1.0272 |
|                                                                                                                                                 | Wave height                   | 1.7049 |
|                                                                                                                                                 | Wave peak period              | 1.3445 |
|                                                                                                                                                 | Wave peak duration            | 1.6255 |
|                                                                                                                                                 | River flow                    | 1.6560 |
|                                                                                                                                                 | $\tau_0$                      | 1.1906 |
|                                                                                                                                                 | Tidal flow                    | 1.2797 |
|                                                                                                                                                 | Phytoplankton abundance       | 1.5386 |
|                                                                                                                                                 | Phytoplankton biomass         | 1.3547 |
|                                                                                                                                                 | Fluorescence at 50 m          | 1.2176 |
|                                                                                                                                                 | SPM at 0 m                    | 1.4934 |
|                                                                                                                                                 | SPM at 10 m                   | 1.1250 |
|                                                                                                                                                 | Sediment [OC] (1-2 cm)        | 1.1556 |
|                                                                                                                                                 | Sediment [OC] (2-3 cm)        | 1.1881 |
|                                                                                                                                                 | Sediment density (3-5 cm)     | 1.0465 |
|                                                                                                                                                 | Macrofauna biomass            | 1.0794 |
|                                                                                                                                                 | Overall Nitrite/Nitrate ratio | 1.5283 |
|                                                                                                                                                 | Nitrite/Nitrate ratio at 50 m | 1.3568 |
|                                                                                                                                                 | Overall [Ammonia]             | 1.5250 |
|                                                                                                                                                 | [Ammonia] at 50 m             | 1.4055 |
|                                                                                                                                                 | Overall [Silicate]            | 1.7070 |
|                                                                                                                                                 | [Silicate] at 50 m            | 1.6048 |
|                                                                                                                                                 | Overall [Phosphate]           | 1.5311 |
|                                                                                                                                                 | [Phosphate] at 50 m           | 1.3186 |
| Model 2; Responses: Variables affecting the biological mixing-driven B/P exchange of DIN; Predictors: Five time periods as specified in Table I | Water temperature at 50 m     | 1.5024 |
|                                                                                                                                                 | D50 (0-1 cm depth)            | 1.3281 |
|                                                                                                                                                 | D50 (1-2 cm depth)            | 1.5478 |
|                                                                                                                                                 | BPc                           | 1.576  |
| Model 3; Responses: Variables affecting advection-driven B/P exchange of DIN; Predictors: Five time periods as specified in Table I             | Bioturbation activity         | 1.0365 |
|                                                                                                                                                 | Wave height                   | 1.5092 |
|                                                                                                                                                 | Wave peak period              | 1.6552 |
|                                                                                                                                                 | Wave peak duration            | 1.5910 |
| Model 4; Responses: Variables affecting the bioirrigation-driven B/P exchange of DIN; Predictors: Five time periods as specified in Table I     | Sediment density (1-2 cm)     | 1.2024 |
|                                                                                                                                                 | Water temperature at 50 m     | 1.524  |
|                                                                                                                                                 |                               |        |
|                                                                                                                                                 |                               |        |
| Model 5; Responses: Variables affecting the diffusion-driven B/P exchange of DIN; Predictors: Five time periods as specified in Table I         | Sediment density (0-1cm)      | 1.6774 |
|                                                                                                                                                 | Sediment density (1-2 cm)     | 1.0986 |
|                                                                                                                                                 | [Nitrite] at 50 m             | 2.3159 |
|                                                                                                                                                 | [O <sub>2</sub> ] at 50 m     | 1.6200 |
| Model 6; Responses: Variables affecting the physical resuspension-driven B/P exchange of DIN; Predictors:                                       | Wave peak period              | 1.4890 |
|                                                                                                                                                 | Wave peak duration            | 1.7244 |
|                                                                                                                                                 | T0                            | 1.3518 |
|                                                                                                                                                 | Tidal flow                    | 1.0494 |

Five time periods as specified in Table I

|                                                                                                                                                            |                           |        |
|------------------------------------------------------------------------------------------------------------------------------------------------------------|---------------------------|--------|
| Model 7; Responses: Variables affecting the upward exchange and resuspension of POC; Predictors: Five time periods as specified in Table I                 | Wave height               | 1.6738 |
|                                                                                                                                                            | Wave peak period          | 1.5877 |
|                                                                                                                                                            | Wave peak duration        | 1.7352 |
|                                                                                                                                                            | T0                        | 1.5206 |
|                                                                                                                                                            | Sediment [OC] (2-3 cm)    | 1.0534 |
|                                                                                                                                                            | Sediment density (2-3 cm) | 1.4673 |
|                                                                                                                                                            | Bioturbation depth        | 1.2217 |
|                                                                                                                                                            | [POC] at 50 m             | 1.1074 |
| Model 8; Responses: Variables affecting the downward exchange and deposition of POC, including SPM; Predictors: Five time periods as specified in Table I  | Water temperature at 50 m | 1.2550 |
|                                                                                                                                                            | Tidal flow                | 2.0048 |
|                                                                                                                                                            | River flow                | 1.0944 |
|                                                                                                                                                            | [SPM] at 0 m              | 1.6994 |
|                                                                                                                                                            | [SPM] at 10 m             | 1.3421 |
|                                                                                                                                                            | [SPM] at 20 m             | 1.2413 |
|                                                                                                                                                            | [SPM] at 30 m             | 1.6096 |
|                                                                                                                                                            | [SPM] at 40 m             | 1.2767 |
|                                                                                                                                                            | [POC] at 10 m             | 1.7630 |
|                                                                                                                                                            | [POC] at 20 m             | 1.7489 |
|                                                                                                                                                            | [POC] at 30 m             | 1.8626 |
|                                                                                                                                                            | [POC] at 40 m             | 1.9624 |
| Model 8a; Responses: Variables affecting the downward exchange and deposition of POC, excluding SPM; Predictors: Five time periods as specified in Table I | Zooplankton abundance     | 1.1891 |
|                                                                                                                                                            | Wave height               | 1.1263 |
|                                                                                                                                                            | River flow                | 1.4385 |
|                                                                                                                                                            | Chlorophyll at 10 m       | 1.3620 |
|                                                                                                                                                            | Tidal flow                | 1.5175 |
|                                                                                                                                                            | POC at 0 m                | 1.2785 |
|                                                                                                                                                            | POC at 20 m               | 1.7559 |
|                                                                                                                                                            | POC at 30 m               | 1.1427 |
|                                                                                                                                                            | POC at 40 m               | 1.4492 |
